# Supplementary material
Source: PubMed Central journal article supplement (PMC4340732)
Supplement: 10.1369_0022155414563800_supp.pdf [file 10.1369_0022155414563800_supp.pdf]

Supplemental Table S1.

Patient and Tumor Characteristics of the Tissue Microarrays.

| Neoplasms | Subtype                            | n | Age<br>median (range) | Gender<br>M / F | pT*(n)                   | pN*(n)                 |
|-----------|------------------------------------|---|-----------------------|-----------------|--------------------------|------------------------|
| Lung      | Adenocarcinoma                     | 5 | 68 (43-76)            | 1 / 4           | pT1(1), pT2(4)           | pN0(4), pN2(1)         |
| Lung      | Squamous cell carcinoma            | 5 | 66 (43-75)            | 2 / 3           | pT1(1), pT2 (3), pT3 (1) | pN0(4), pN1(1)         |
| Esophagus | Squamous cell carcinoma            | 5 | 75 (50-77)            | 5 / 0           | pT3(5)                   | pN0(2), pN1(2), pN2(1) |
| Stomach   | Adenocarcinoma                     | 5 | 61 (54-67)            | 2 / 3           | pT2(4), pT4(1)           | pN0(2), pN1(2), pN2(1) |
| Colon     | Adenocarcinoma                     | 5 | 64 (57-77)            | 3 / 2           | pT2(2), pT3(3)           | pN0(3), pN2(2)         |
| Liver     | Hepatocellular carcinoma           | 5 | 58 (52-71)            | 4 / 1           | pT1(2), pT3(2)           | pN0(2),                |
| Liver     | Intrahepatic<br>cholangiocarcinoma | 5 | 59 (46-67)            | 4 / 1           | pT1(2), pT2(2), pT4(1)   | pN0(4), pN1(1)         |
| Bile duct | Adenocarcinoma                     | 5 | 64 (50-72)            | 3 / 2           | pT1(1), pT3(3), pT4(1)   | pN1(3), pN2(2)         |

|                |                         |   |            |       |                                   |                         |
|----------------|-------------------------|---|------------|-------|-----------------------------------|-------------------------|
| Pancreas       | Adenocarcinoma          | 5 | 54 (51-64) | 3 / 2 | pT3(1), pT4(4)                    | pN0(1), pN1(1), pN2(3)  |
| Prostate       | Adenocarcinoma          | 5 | 70 (53-74) | 5 / 0 | pT2a(2), pT2c(2), pT3a(1)         | pN0(5)                  |
| Kidney         | Renal cell carcinoma    | 5 | 52 (43-66) | 1 / 4 | pT1a(3), pT2(2)                   | pN0(2)                  |
| Renal pelvis   | Urothelial carcinoma    | 5 | 73 (57-87) | 4 / 1 | pT3(3), pT4(2)                    | pN0(4), pN1(1)          |
| Breast         | Ductal carcinoma        | 5 | 57 (43-59) | 0 / 5 | pT2(4), pT3(1)                    | pN0(1), pN1(3)          |
| Uterine cervix | Squamous cell carcinoma | 5 | 34 (31-54) | 0 / 5 | pT1b(4), pT2b                     | pN0(4), pN1(1)          |
| Uterine corpus | Adenocarcinoma          | 5 | 50 (45-68) | 0 / 5 | pT1a(4), pT2(1)                   | pN0(2), pN1(1)          |
| Thyroid        | Papillary carcinoma     | 5 | 54 (42-70) | 1 / 4 | pT2(1), pT3(1), pT4a(2)           | pN1a(3), pN1b(1)        |
| Thyroid        | Follicular carcinoma    | 3 | 70 (56-71) | 1 / 2 | pT2(3)                            |                         |
| Tongue         | Squamous cell carcinoma | 5 | 66 (48-86) | 2 / 3 | pT1(1), pT2(1), pT3(1),<br>pT4(2) | pN2(1)                  |
| Larynx         | Squamous cell carcinoma | 5 | 60 (54-79) | 5 / 0 | pT3(2), pT4(3)                    | pN0(2), pN1(1), pN2c(1) |
| Skin           | Squamous cell carcinoma | 5 | 59 (15-92) | 3 / 2 | pT2(5)                            |                         |

\* International Union Against Cancer (UICC). TNM Classification of Malignant Tumours, 7th ed. Sobin LH, Gospodarowicz MK, Wittekind Ch., eds. New York: Wiley; 2010.

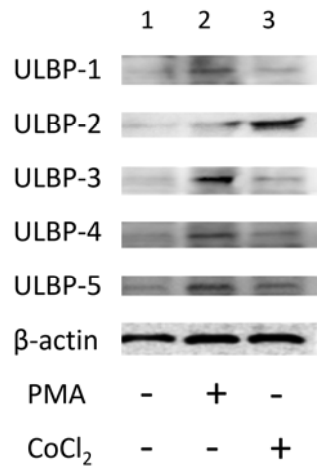

Figure S1

Western blot analysis of NKG2D ligands in HeLa cells. Lane 1: control, Lane 2: 40 ng/mL phorbol myristate acetate (PMA), Lane 3: 75 ng/mL cobalt chloride (CoCl<sub>2</sub>).

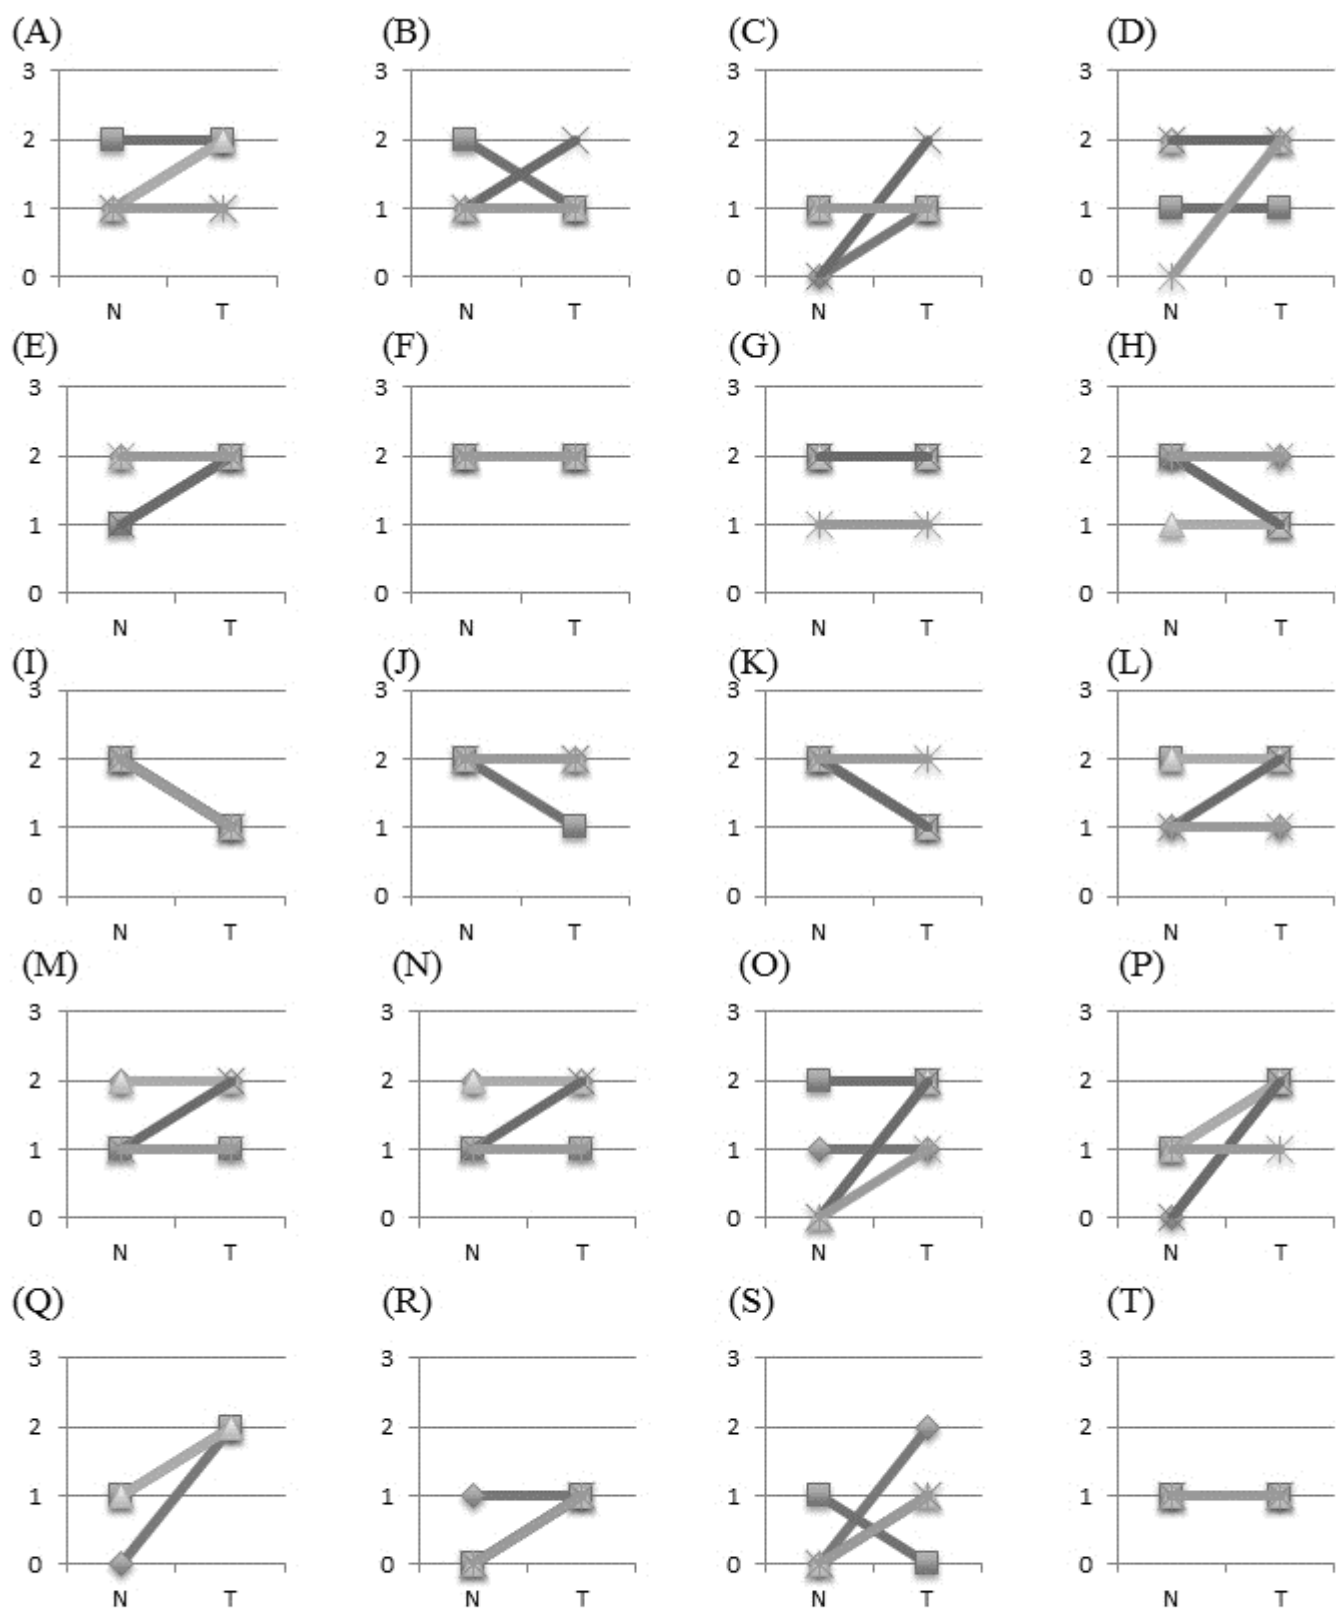

Figure S2-1

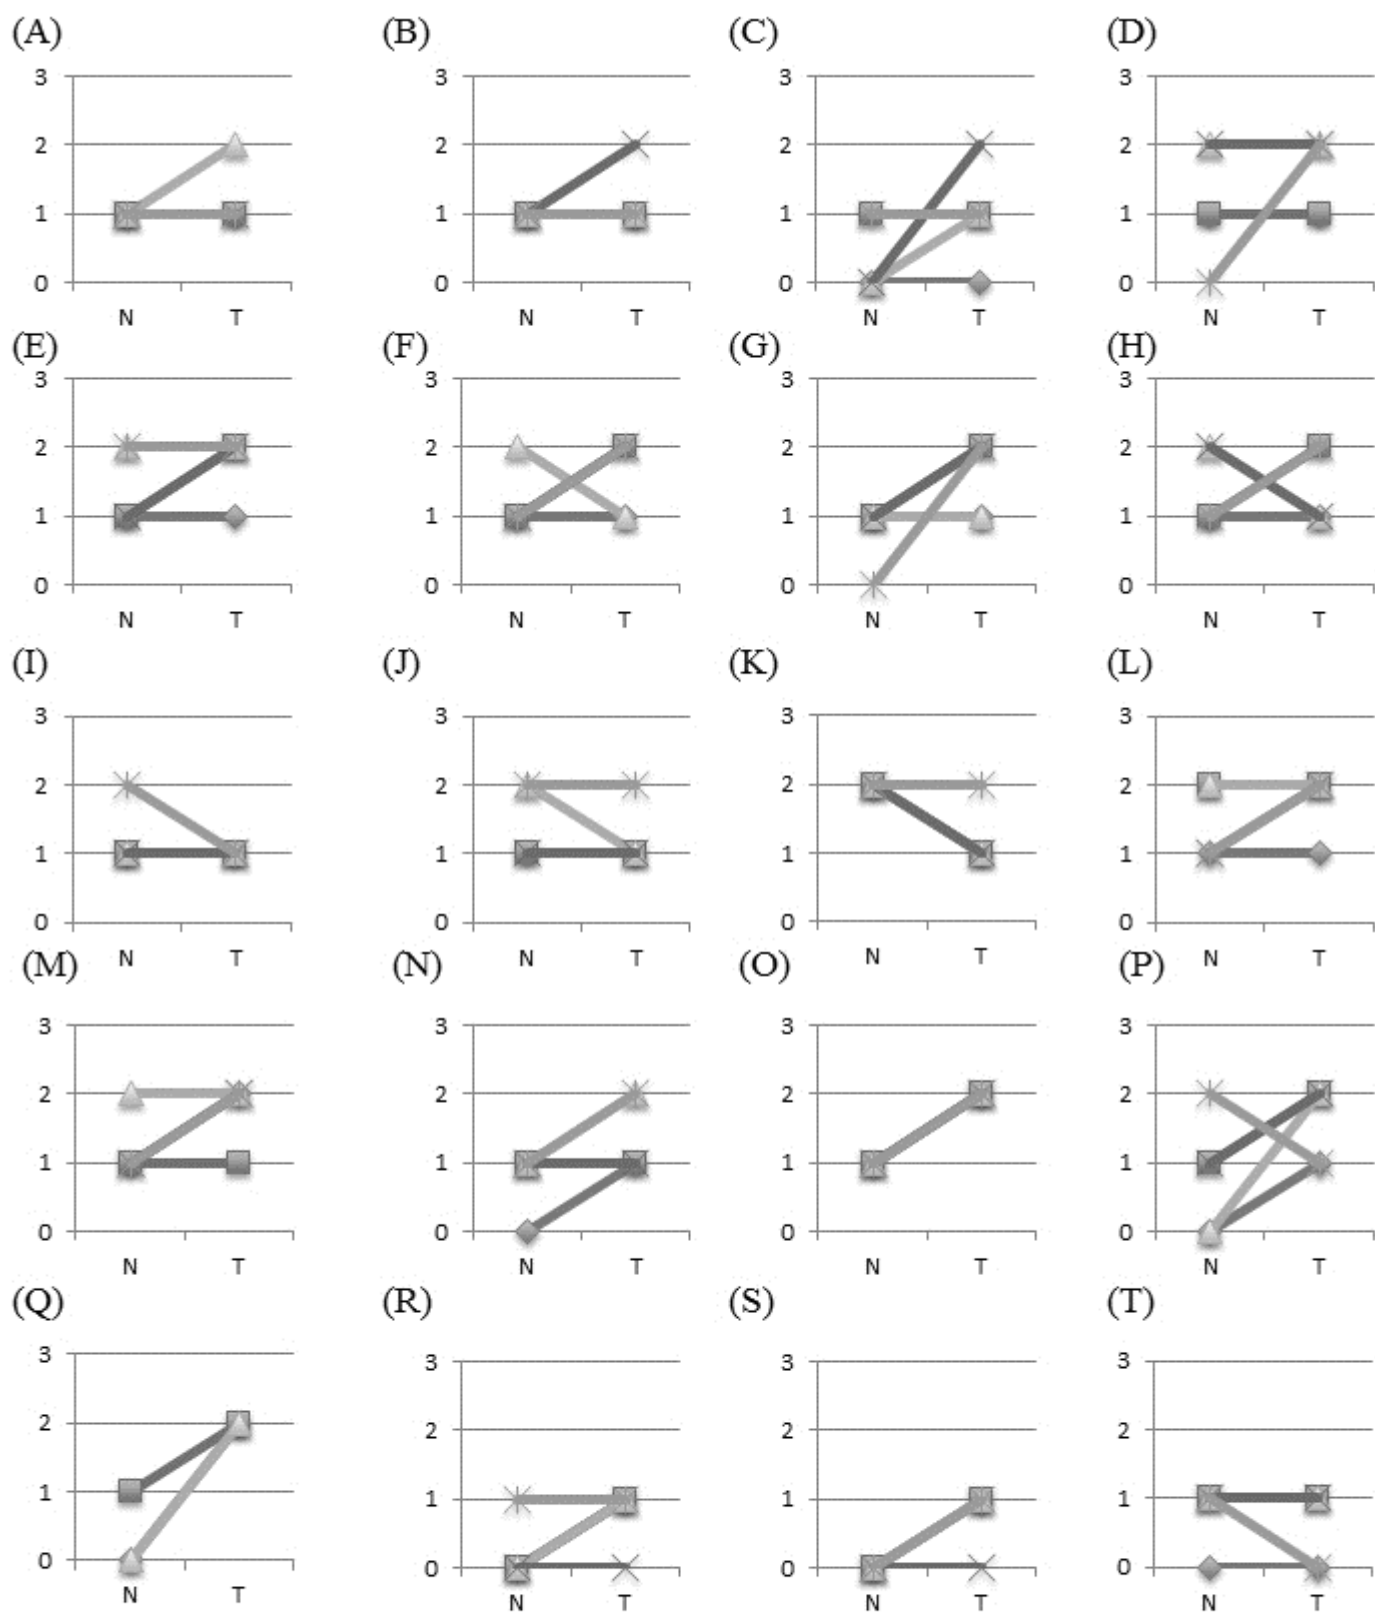

Figure S2-2

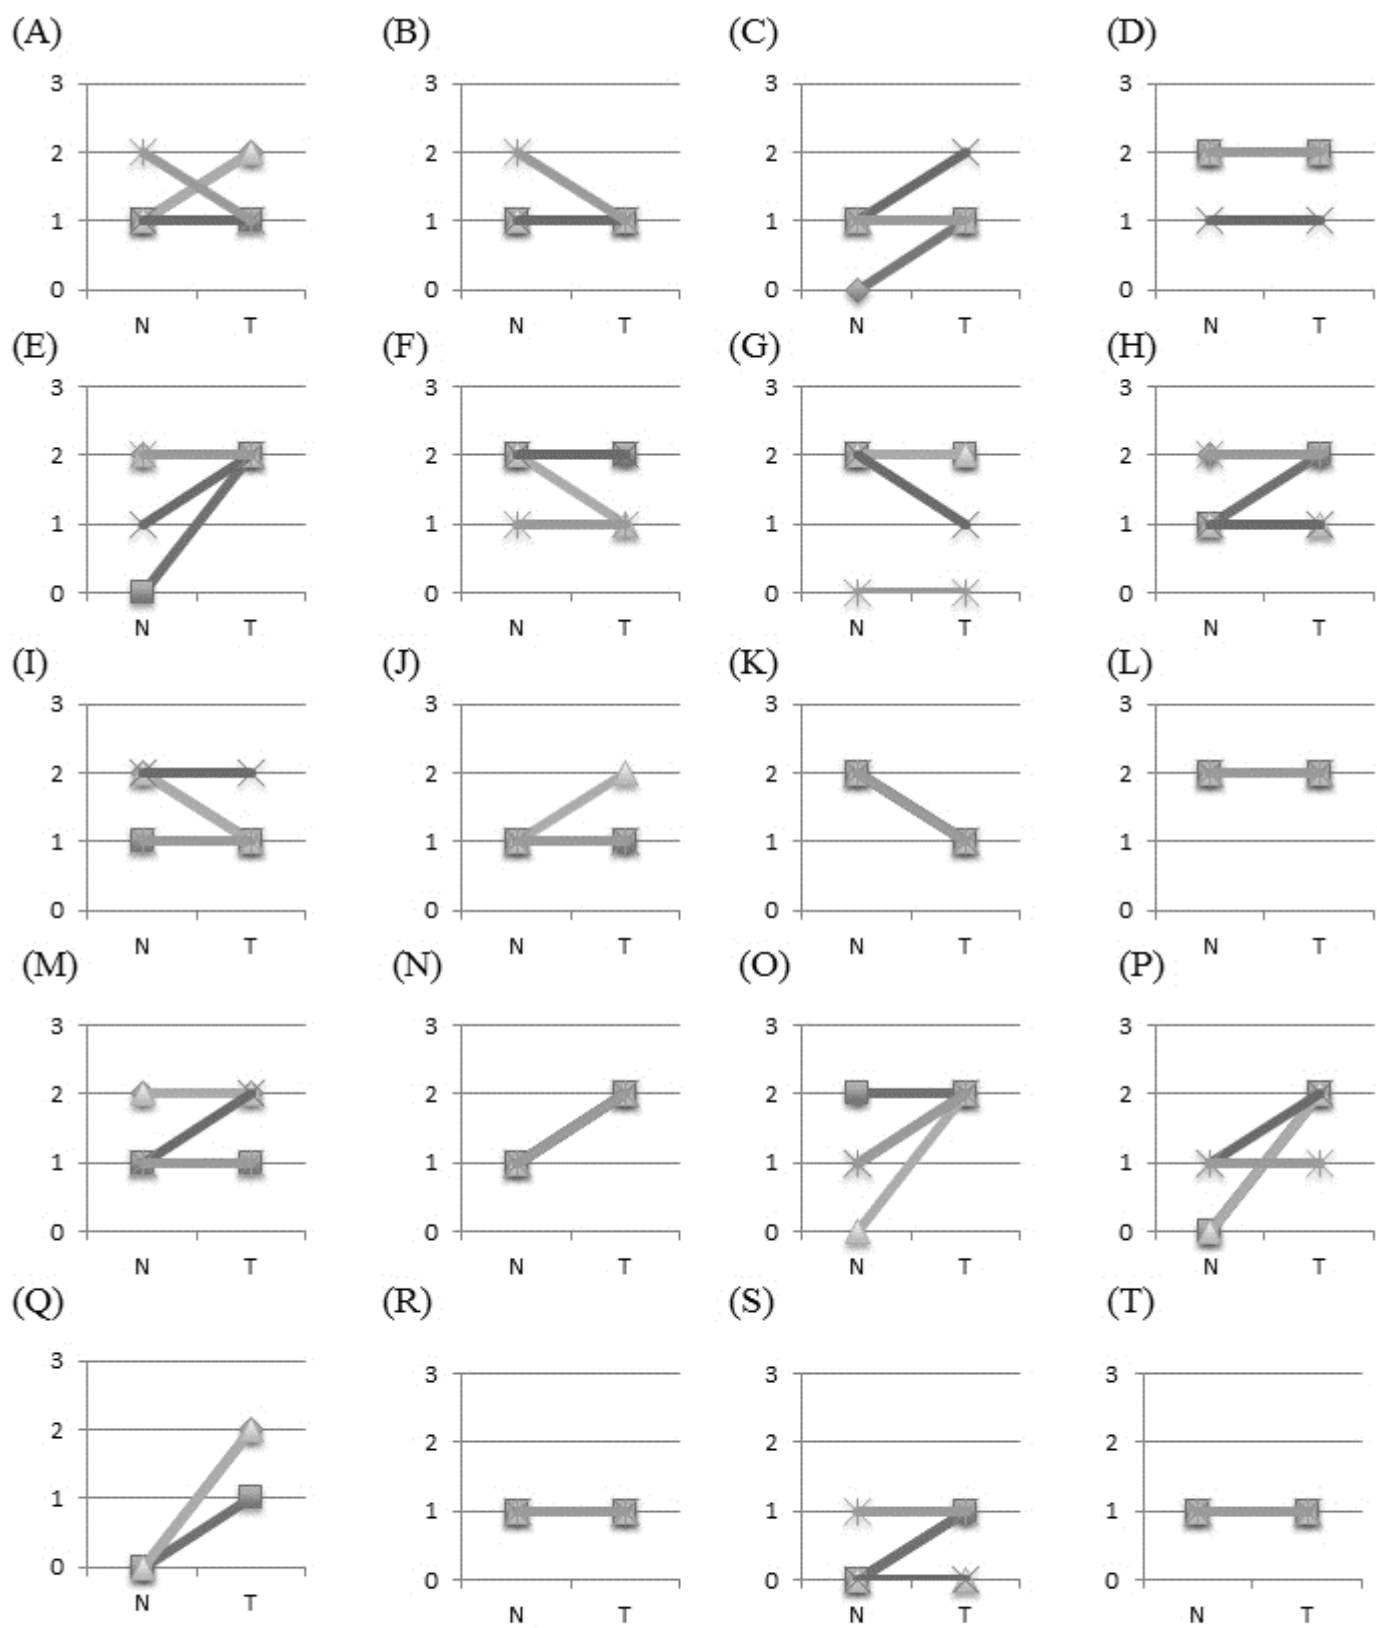

Figure S2-3

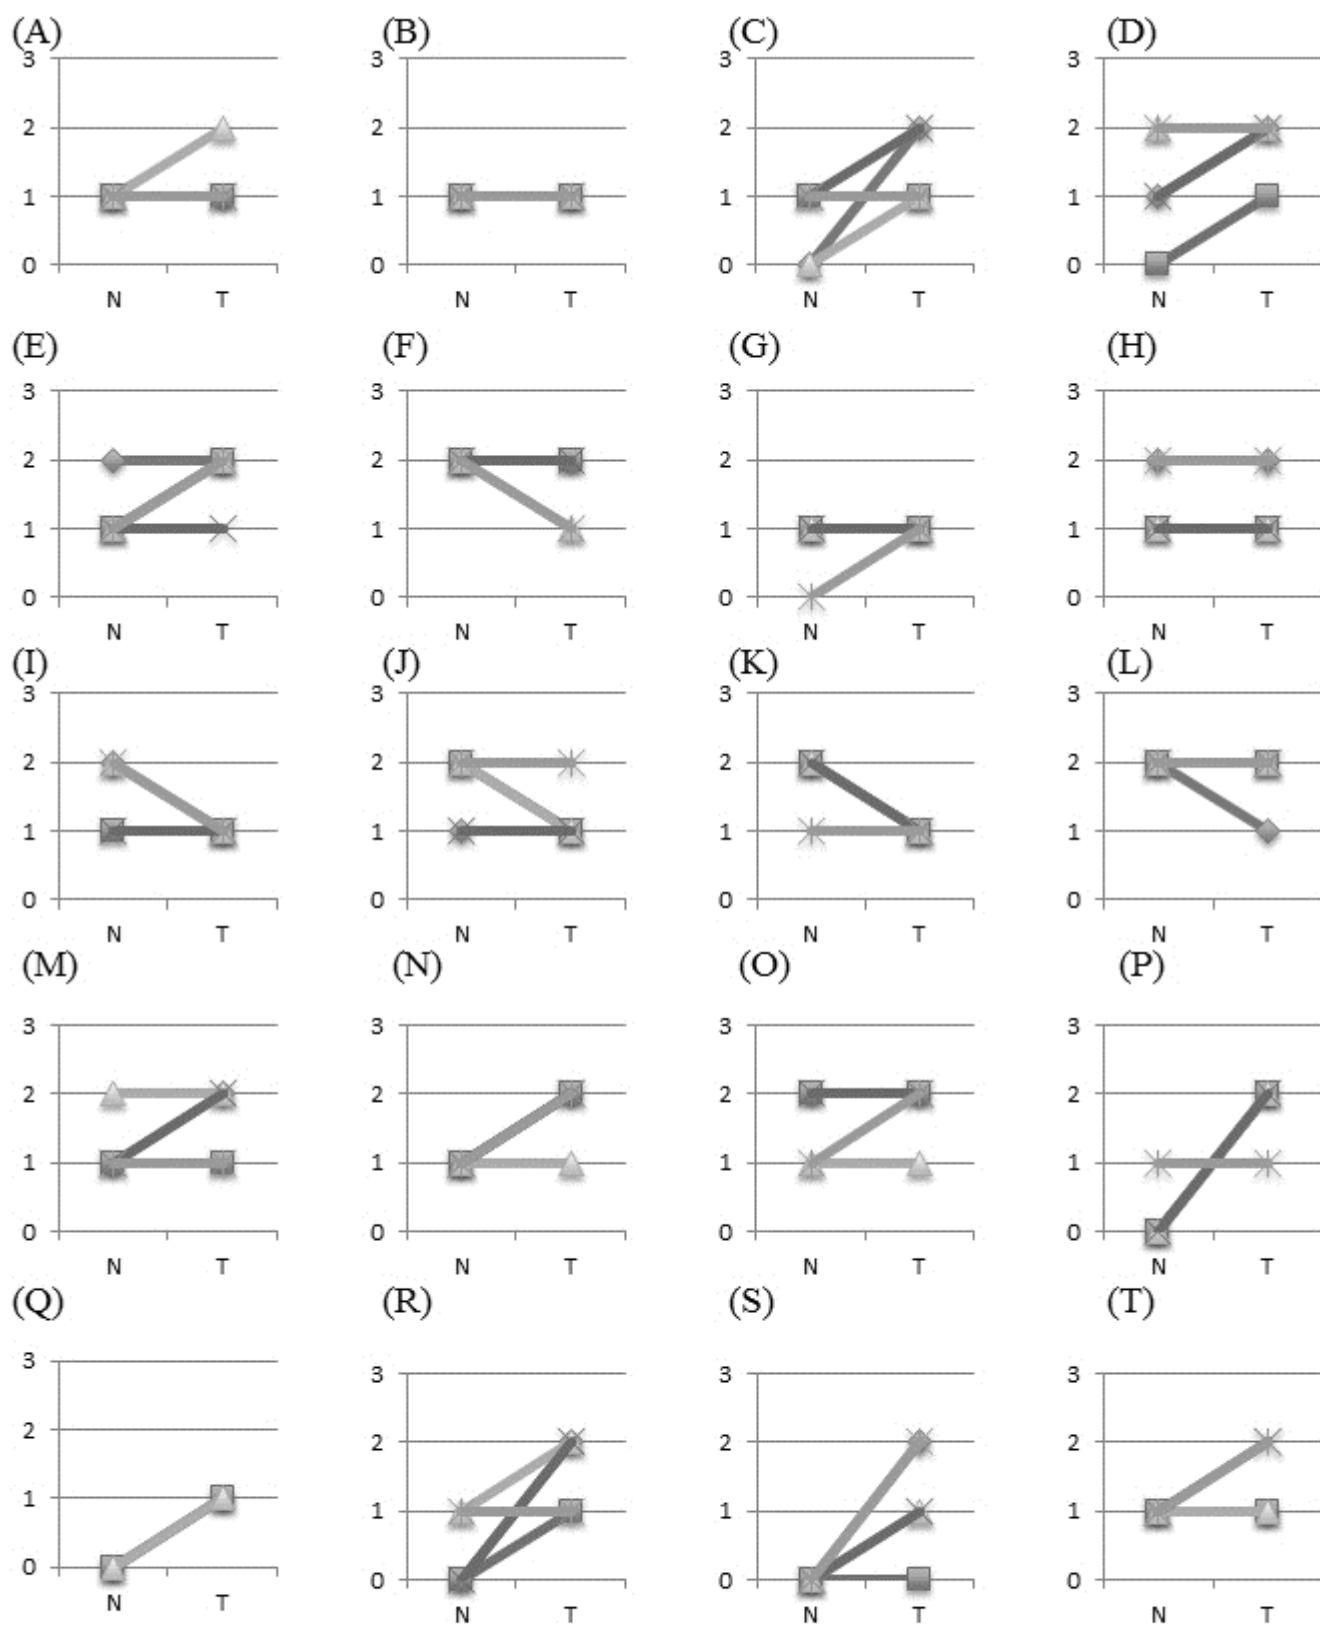

Figure S2-4

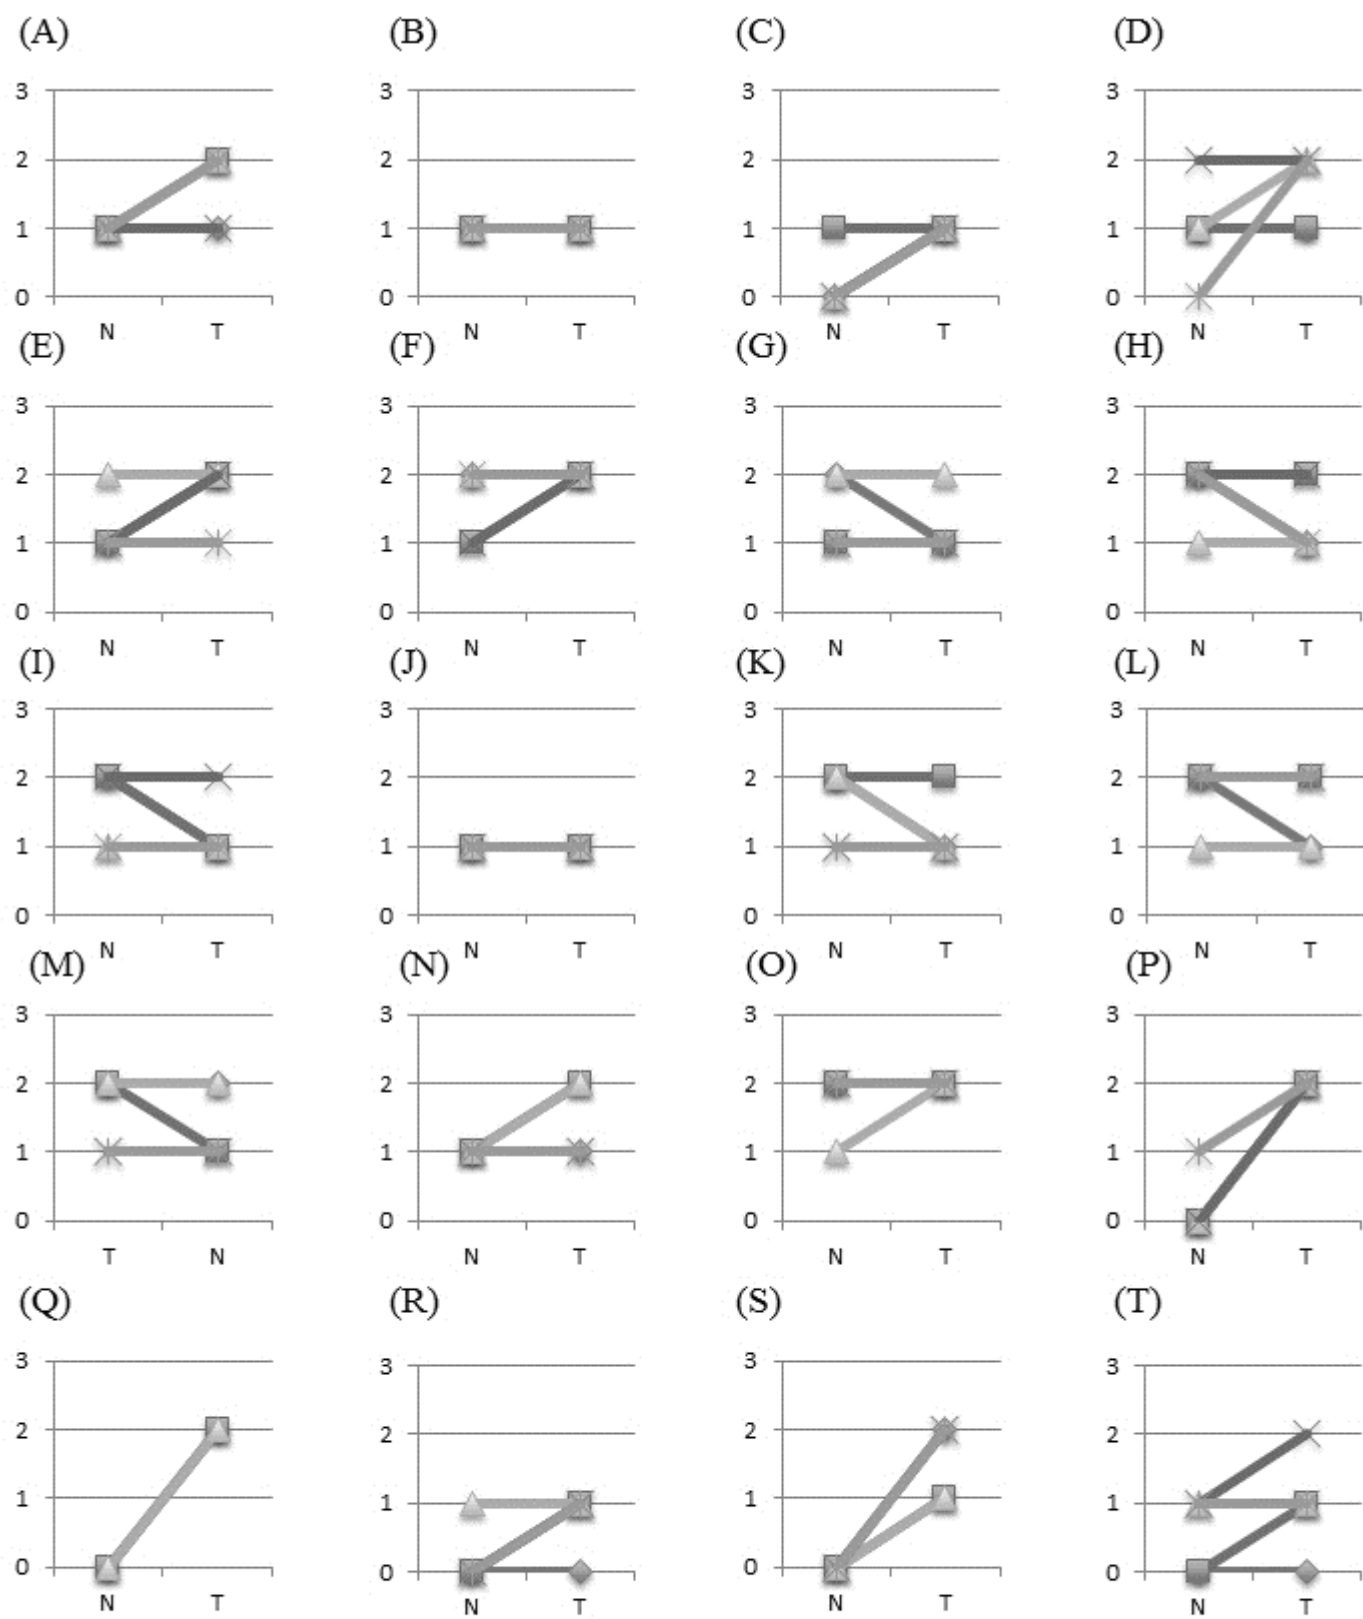

Figure S2-5



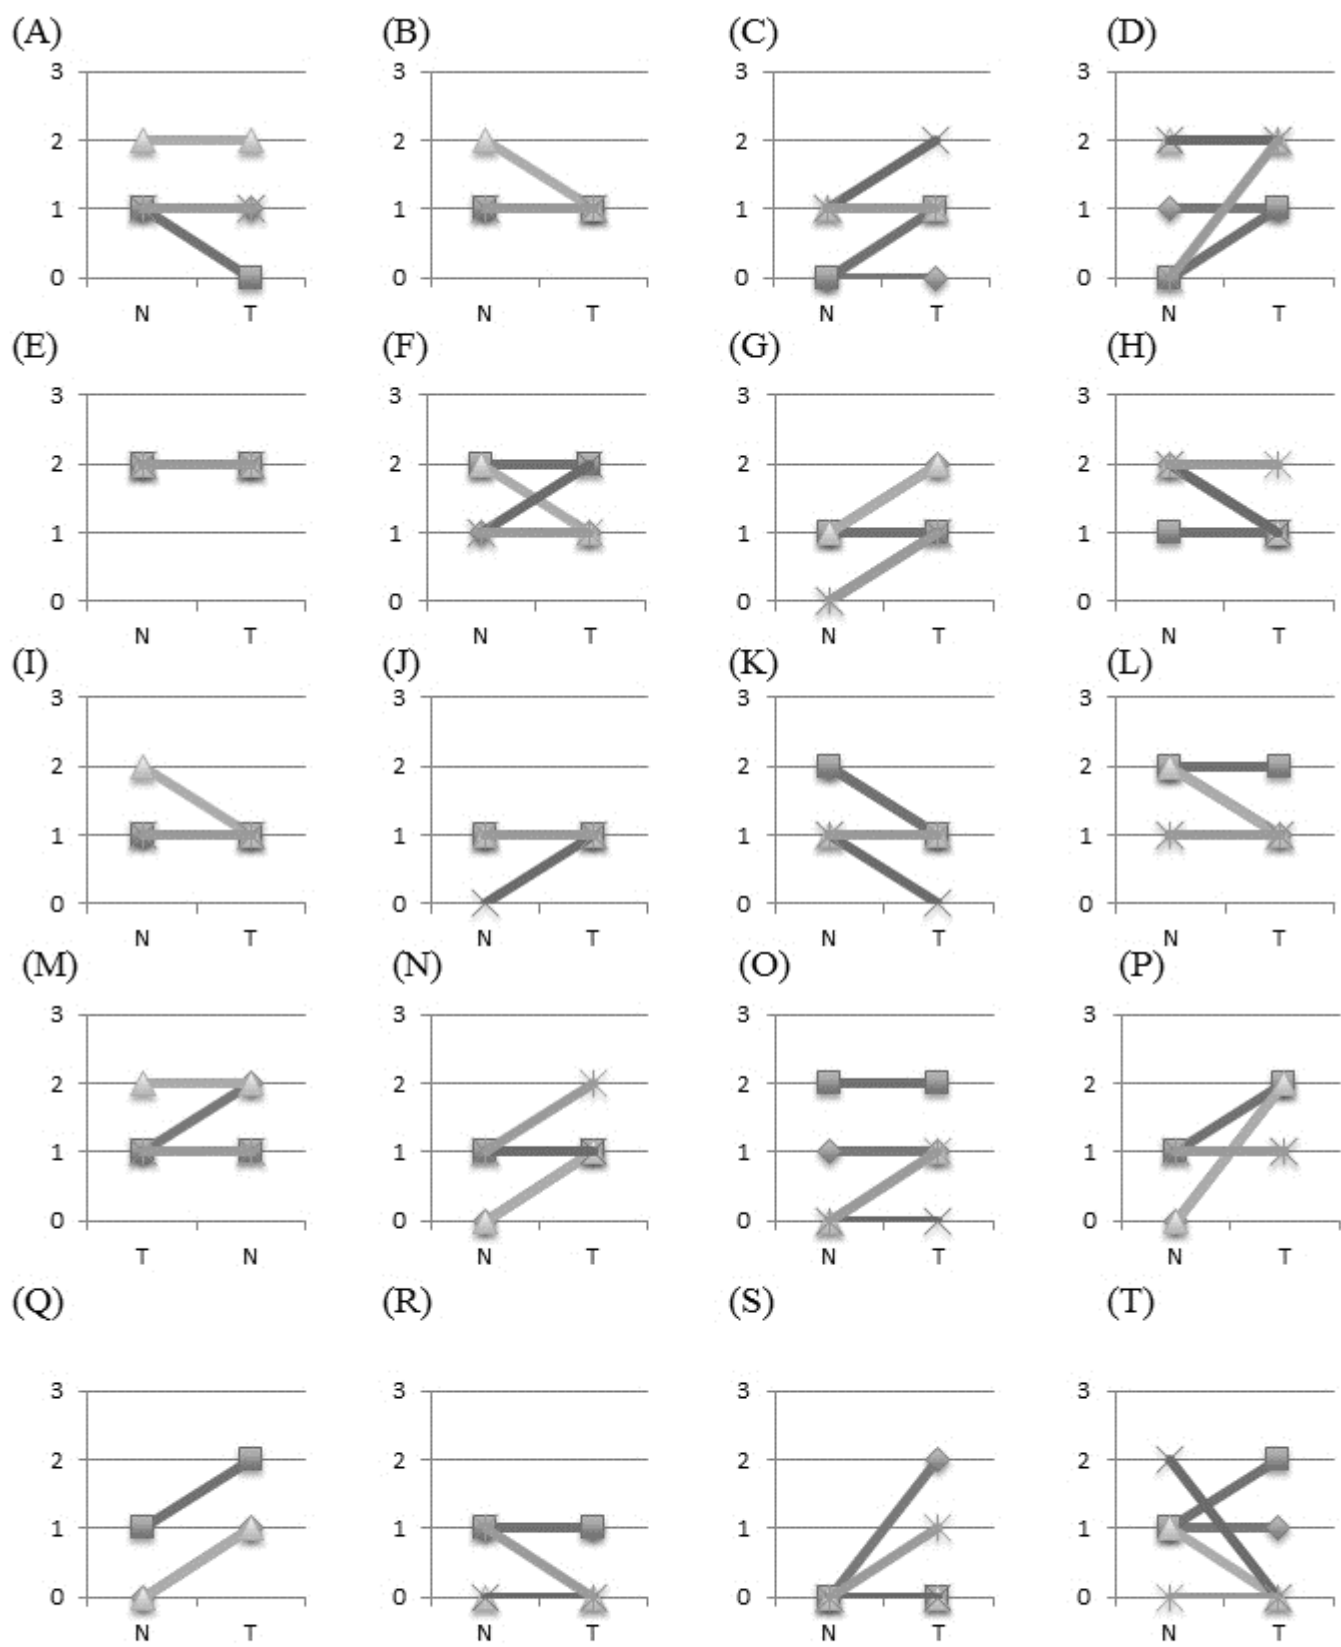

Figure S2-6

**Figure S2-1 (ULBP1), S2-2(ULBP2/6), S2-3(ULBP3), S2-4(ULBP4), S2-5(ULBP5), S2-6(MICA/B)**

NKG2DLs expression score for single pairs of non-neoplastic/neoplastic tissue for each tumor. (A) Lung (Adenocarcinoma), (B) Lung (Squamous cell carcinoma), (C) Esophagus (Squamous cell carcinoma), (D) Stomach (Adenocarcinoma), (E) Colon (Adenocarcinoma), (F) Liver (Hepatocellular carcinoma), (G) Liver (Intrahepatic cholangiocarcinoma), (H) Bile duct (Adenocarcinoma), (I) Pancreas (Adenocarcinoma), (J) Prostate (Adenocarcinoma), (K) Kidney (Renal cell carcinoma), (L) Renal plevis (Urothelial carcinoma), (M) Breast (Ductal carcinoma), (N) Uterine cervix (Squamous cell carcinoma), (O) Uterine corpus (Adenocarcinoma), (P) Thyroid (Papillary carcinoma), (Q) Thyroid (Follicular carcinoma), (R) Tongue (Squamous cell carcinoma), (S) Larynx (Squamous cell carcinoma), (T) Skin (Squamous cell carcinoma). N: Normal counterpart, T: Tumor.
